# Supplementary material for: Circadian abnormalities in a mouse model of high trait anxiety and depression
Source: PubMed Central journal article supplement — Ann Med. 2014 Jan 10;46(3):148–54. doi: 10.3109/07853890.2013.866440 (PMC4025598; doi:10.3109/07853890.2013.866440), 2014-01-10
Supplement: ANN-46-148-s1.pdf [file ANN-46-148-s1.pdf]

Supplementary material for Griesauer I, et al. Circadian abnormalities in a mouse model of high trait anxiety and depression. *Ann Med.* 2014;46:148–54.

Supplementary Table I. Sequences of primers used.

| Primer Name          | Primer length (bp) | sequence(5' to 3')              |
|----------------------|--------------------|---------------------------------|
| mus_Bmal1_fwd        | 20                 | AAC CTT CCC GCA GCT AAC AG      |
| mus_Bmal1_rev        | 20                 | AGT CCT CTT TGG GCC ACC TT      |
| mus_Clock_fwd        | 21                 | GGC GTT GTT GAT TGG ACT AGG     |
| mus_Clock_rev        | 21                 | GAA TGG AGT CTC CAA CAC CCA     |
| mus_Cry1_fwd         | 21                 | AGG AGG ACA GAT CCC AAT GGA     |
| mus_Cry1_rev         | 21                 | GCA ACC TTC TGG ATG CCT TCT     |
| mus_Cry2_fwd         | 21                 | AGC TGA TGT GTT CCC AAG GCT     |
| mus_Cry2_rev         | 20                 | CAT AAT GGC TGC ATC CCG TT      |
| mus_Cyclo B_fwd      | 21                 | GGT GGA GAG CAC CAA GAC AGA     |
| mus_Cyclo B_rev      | 19                 | GCC GGA GTC GAC AAT GAT G       |
| mus_Dbp_fwd          | 22                 | GGA ACT GAA GCC TCA ACC AAT C   |
| mus_Dbp_rev          | 21                 | CTC CGG CTC CAG TAC TTC TCA     |
| mus_E4bp4_fwd        | 23                 | AGA ACC ACG ATA ACC CAT GAA AG  |
| mus_E4bp4_rev        | 23                 | GAC TTC AGC CTC TCA TCC ATC AA  |
| mus_Id2_fwd          | 22                 | AGG CAT CTG AAT TCC CTT CTG A   |
| mus_Id2_rev          | 24                 | AGT CCC CAA ATG CCA TTT ATT TAG |
| mus_Npas2_fwd        | 21                 | ACG CAG ATG TTC GAG TGG AAA     |
| mus_Npas2_rev        | 19                 | CGC CCA TGT CAA GTG CAT T       |
| mus_Per1_fwd         | 24                 | CCA GAT TGG TGG AGG TTA CTG AGT |
| mus_Per1_rev         | 24                 | GCG AGA GTC TTC TTG GAG CAG TAG |
| mus_Per2_fwd         | 21                 | AGA ACG CGG ATA TGT TTG CTG     |
| mus_Per2_rev         | 21                 | ATC TAA GCC GCT GCA CAC ACT     |
| mus_Per3_fwd         | 20                 | CCG CCC CTA CAG TCA GAA AG      |
| mus_Per3_rev         | 20                 | GCC CCA CGT GCT TAA ATC CT      |
| mus_Rev-erbalpha_fwd | 23                 | CCC TGG ACT CCA ATA ACA ACA CA  |
| mus_Rev-erbalpha_rev | 22                 | GCC ATT GGA GCT GTC ACT GTA G   |
| mus_Rev-erbbeta_fwd  | 19                 | GGA ACG GAC CGT CAC CTT T       |
| mus_Rev-erbbeta_rev  | 19                 | TCC CCT GCT CCC ATT GAG T       |
